# Supplementary material for: Assessing Validity of Self-Reported Dietary Intake within a Mediterranean Diet Cluster Randomized Controlled Trial among US Firefighters
Source: PubMed Central journal article supplement (PMC6769698; doi:10.3390/nu11092250), 2019-09-19
Supplement: nutrients-11-02250-s001.pdf [file nutrients-11-02250-s001.pdf]

**Supplementary Table S1. Modified Mediterranean Score.**

| Dietary Domain              | Question(s)                                                                                               | Score Criteria                                                | Score |
|-----------------------------|-----------------------------------------------------------------------------------------------------------|---------------------------------------------------------------|-------|
| Fast food                   | How many times per week do you eat fast-food or take-out food?                                            | Never                                                         | 4     |
|                             |                                                                                                           | 1 or less                                                     | 3     |
|                             |                                                                                                           | 2-4                                                           | 2     |
|                             |                                                                                                           | 5-7                                                           | 1     |
|                             |                                                                                                           | 8+                                                            | 0     |
| Fruits                      | How many servings of fruit do you consume per day?                                                        | 5+                                                            | 4     |
|                             |                                                                                                           | 3-4                                                           | 3     |
|                             |                                                                                                           | 2-3                                                           | 2     |
|                             |                                                                                                           | 1 or less                                                     | 1     |
|                             |                                                                                                           | 0                                                             | 0     |
| Vegetables                  | How many servings of vegetables (not including potatoes) do you consume per day?                          | 5+                                                            | 4     |
|                             |                                                                                                           | 3-4                                                           | 3     |
|                             |                                                                                                           | 2-3                                                           | 2     |
|                             |                                                                                                           | 1 or less                                                     | 1     |
|                             |                                                                                                           | 0                                                             | 0     |
| Legumes                     | How many servings of legumes (e.g. beans, chickpeas, lentils) do you consume per week?                    | 7+                                                            | 4     |
|                             |                                                                                                           | 5-6                                                           | 3     |
|                             |                                                                                                           | 3-4                                                           | 2     |
|                             |                                                                                                           | 2-3                                                           | 1     |
|                             |                                                                                                           | 1 or less                                                     | 0     |
| Nuts                        | How many servings of nuts (e.g. walnuts, almonds, hazelnuts, pistachio, peanuts) do you consume per week? | 7+                                                            | 4     |
|                             |                                                                                                           | 5-6                                                           | 3     |
|                             |                                                                                                           | 3-4                                                           | 2     |
|                             |                                                                                                           | 2-3                                                           | 1     |
|                             |                                                                                                           | 1 or less                                                     | 0     |
| Sweet desserts              | How many times per week do you eat sweet desserts (cake, cookies, pie, ice cream, etc.)?                  | 1 or less                                                     | 4     |
|                             |                                                                                                           | 2-3                                                           | 3     |
|                             |                                                                                                           | 3-4                                                           | 2     |
|                             |                                                                                                           | 5-6                                                           | 1     |
|                             |                                                                                                           | 7+                                                            | 0     |
| Oil or fat at home          | Which oil or fat do you use most often for cooking and serving food at home?                              | EVOO                                                          | 5     |
|                             |                                                                                                           | Olive oil                                                     | 4     |
|                             |                                                                                                           | Benechol or Smart Balance                                     | 3     |
|                             |                                                                                                           | Corn or vegetable oil                                         | 2     |
|                             |                                                                                                           | Margarine                                                     | 1     |
|                             |                                                                                                           | Butter, Lard or other animal fat, or None                     | 0     |
|                             |                                                                                                           |                                                               |       |
| Oil or fat at the firehouse | Which oil or fat do you use most often for cooking and serving food at the firehouse?                     | EVOO                                                          | 5     |
|                             |                                                                                                           | Olive oil                                                     | 4     |
|                             |                                                                                                           | Benechol or Smart Balance                                     | 3     |
|                             |                                                                                                           | Corn or vegetable oil                                         | 2     |
|                             |                                                                                                           | Margarine                                                     | 1     |
|                             |                                                                                                           | Butter, Lard or other animal fat, or None                     | 0     |
|                             |                                                                                                           |                                                               |       |
| Fried foods                 | How many times per week do you eat fried foods (french fries, fried chicken, chicken nuggets, etc.)?      | Never                                                         | 4     |
|                             |                                                                                                           | 1 or less                                                     | 3     |
|                             |                                                                                                           | 2-3                                                           | 2     |
|                             |                                                                                                           | 3-4                                                           | 1     |
|                             |                                                                                                           | 5+                                                            | 0     |
| Breads or starches at home  | Which bread or starch do you most frequently eat at home?                                                 | Whole wheat/multi-grain/pasta or brown rice                   | 4     |
|                             |                                                                                                           | I do not eat bread or starch / Durum wheat bread or dry pasta | 3     |
|                             |                                                                                                           | French/Italian/Multigrain or other crusty bread               | 2     |
|                             |                                                                                                           | White bread/ macaroni/pasta/rice or potatoes, filled pasta    | 0     |
|                             |                                                                                                           |                                                               |       |

|                                      |                                                                                                                                     |                                                               |   |
|--------------------------------------|-------------------------------------------------------------------------------------------------------------------------------------|---------------------------------------------------------------|---|
| Breads or starches at the firehouse  | Which bread or starch do you most frequently eat at the firehouse?                                                                  | Whole wheat/multi-grain/pasta or brown rice                   | 4 |
|                                      |                                                                                                                                     | I do not eat bread or starch / Durum wheat bread or dry pasta | 3 |
|                                      |                                                                                                                                     | French/Italian/Multigrain or other crusty bread               | 2 |
|                                      |                                                                                                                                     | White bread/macaroni/pasta/rice or potatoes, filled pasta     | 0 |
| Ocean fish                           | How many times per week do you eat baked, broiled, grilled, or blackened (not fried) ocean fish (salmon, tuna, cod, haddock, etc.)? | 5+                                                            | 4 |
|                                      |                                                                                                                                     | 3-4                                                           | 3 |
|                                      |                                                                                                                                     | 2-3                                                           | 2 |
|                                      |                                                                                                                                     | 1 or less                                                     | 1 |
|                                      |                                                                                                                                     | 0                                                             | 0 |
| Alcoholic beverages                  | How many alcoholic beverages (beer, wine, hard liquor, etc.) do you drink over a typical week?                                      | 5-20                                                          | 4 |
|                                      |                                                                                                                                     | 1-4                                                           | 2 |
|                                      |                                                                                                                                     | 21+                                                           | 1 |
| Beverages                            | When you drink alcoholic beverages, what type do you drink?                                                                         | Red or White wine                                             | 2 |
|                                      |                                                                                                                                     | Beer / Hard liquors / Don't drink                             | 0 |
| Non-alcoholic beverages at home      | Which of the following non-alcoholic beverages do you most frequently drink at home?                                                | Water                                                         | 4 |
|                                      |                                                                                                                                     | Juice / Tea / Coffee                                          | 2 |
|                                      |                                                                                                                                     | Milk / Fruit drink or punch / Diet cola/soda                  | 1 |
|                                      |                                                                                                                                     | Cola/soda/Other                                               | 0 |
| Non-alcoholic beverages at firehouse | Which of the following non-alcoholic beverages do you most frequently drink at the firehouse?                                       | Water                                                         | 4 |
|                                      |                                                                                                                                     | Juice / Tea / Coffee                                          | 2 |
|                                      |                                                                                                                                     | Milk / Fruit drink or punch / Diet cola/soda                  | 1 |
|                                      |                                                                                                                                     | Cola/soda/Other                                               | 0 |

Supplementary Table S2. Correlation between the scores.

|                       | mMDS | mMDS Derived from FFQ | PREDIMED |
|-----------------------|------|-----------------------|----------|
| <b>Baseline</b>       |      |                       |          |
| mMDS                  | 1.0  | 0.74                  | 0.72     |
| mMDS Derived from FFQ | 0.74 | 1.0                   | 0.57     |
| PREDIMED              | 0.72 | 0.57                  | 1.0      |
| <b>12 months</b>      |      |                       |          |
| mMDS                  | 1.0  | 0.42                  | 0.69     |
| mMDS Derived from FFQ | 0.42 | 1.0                   | 0.48     |
| PREDIMED              | 0.69 | 0.48                  | 1.0      |
| <b>18 months</b>      |      |                       |          |
| mMDS                  | 1.0  | 0.59                  | 0.58     |
| mMDS Derived from FFQ | 0.59 | 1.0                   | 0.37     |
| PREDIMED              | 0.58 | 0.37                  | 1.0      |

mMDS: modified Mediterranean Diet; FFQ: Food Frequency Questionnaire
